# Supplementary material
Source: PubMed Central journal article supplement (PMC1356542)
Supplement: plntcell_tpc.105.036079_1.pdf [file plntcell_tpc.105.036079_1.pdf]

atgtagtgcagtcgctgctgacacctgacattacaattgtgtcattacttgaacttacag 60  
 ttgtaactaaattctctttcttacatttcaacttatttttctgctctaccaaaacaactcc 120  
 atcgggtggtcgagtttgagctttagactaaattcctctagctaatttactccattac 240  
 cctaaaacttatgaatgatatacaaaaaaacttggctgttagtgaatcttctgggtctc 300  
 caccagattgtccaagtctccaagggaaaaaacaattatagtgtacatatgaaaagg 360  
 ttgcaagaagagtacatacaatgacagaaaaatgaatatagaaggctgacttgaggggga 420  
 ctatatatatctgtctccatcagtagcttgtcgatctatactacataccgggatctagt 480  
 tagaatcaagccactcgtttgggttaagtattataaaaaataagctctcagggcctctta 540  
 agattgtgtgacgcaagacttttgaaaacctatataacatagcacatggctctcaggttcc 600  
 ttaccatactactatatatgtatatcactcttttctcataaaagcacactcgaatatttc 660  
 tacttcaattaatatttccaccctaacagattagagagaatggtagtggtaagagat 720  
 gcgattagctgttgccttgatgccacgcacacgtccttctcctcatgaaatattaccaata 780  
 ctactatctatatatgggatactgacagactaactcttttaactcctgtttaccaaaatg 840  
 tgtatcatatataagaattgtctaaaaacagggtcagctaggctgtttagatgggctgtc 900  
 gggcattcagagtgatggatataagtgtggccacatgccatcatatcacttgtccattc 960  
 tttatcttatcttgcctatcaacatttacttactactctgtgccattacttcaattatt 1020  
 ttagtctctgtattagtttcaacttcaaggtacgtaacacatttgtatccatagccaaa 1080  
 aaaaaaacacatttatatccatatagttttagttgcctccttgtagtttttagacccaaa 1140  
 agtcatcaaccggccaaaatcctcaatagtggccttaccaaaacagagcatatagatgat 1200  
 cattaattatgggactatcagggttttgatgttttcaaatacaaaattacatgcct 1260  
 cttagcatatattttcacattatataacataaatttctgtaaccttaaggaaggaaccg 1320  
 cacatccataatgacttgactgactttgtgtgtatgtagctatagcggcattttggatca 1380  
 tcaccggaccaatcgacatcacatgttccttagtatgtattcctgttttgaagttaaaa 1440  
 agatattacgggtatgtgctggatagcgtggcttagtgttgcaaaaaaaaggaagaaga 1500  
 ttcaacggccaccaatttcatcttttagccaacaatgtatgttaaatgcatcaataa 1560  
 attcatgagctgccatctgttttctctctctctctcattaacttaatttctctctca 1620

**AY084590 5' RACE**  
 cgcattttgtcttttgcaacatcaccaccatacatatacaacttacatacatcacgtc 1680  
 ttccacaagactcaactccacagcATGGGATTCTCACGGTCGCTCAACCGCACCGTGGG 1740

← *bdg-1*  
 CCGTCTTCGCTTCTTCATCCTCGACATTGTTGATTCTCTGCTTTGCTTTACCTACAAGAC 1800  
 TCTTGATTTCTTCTCGAGTCCGAGTGGAAACCTGCTACTGCTGTCCGCCGCCGAGGC 1860  
 CAAACCAATCTCGGCTGGAGGGAACAGAGGCGGTAAGATGATAGTGTGCGAAAGATCAGG 1920  
 AGACTACTCGAAGGTGGTCTCACTCACAAGGACAAAGATCTATCTGGATGAGATCTCCGA 1980  
 CACACTCTACTCTCGCCCTTCACTCTCACCAGGCTCACTAAGCTGGTGAAGTGCTTCAA 2040  
 GAAAGATGTTGTTAAATGCTGTGATGAGTCCAAGAAGAGATCACCGTCAACTAAAAAGAC 2100  
 ATTACTCACTGTCAACTCCACGGTGGTTCGAGAAGTTGCAAAGAACCAAGATGGTCTGA 2160  
 TTGCCATTGCACCTTTCTGCACCTTCTGGCTTTCCTCTTCCAACCAATCTCTTTTGTCAA 2220  
 TGTCCAACAGCCACAGgtacatatataatataatataatataatataatataatataat 2280  
 ttataataatctcagtcacctgtttcgttgtctcttttgaatttgaaaacctttccca 2340  
 ctctaagtctcctgcagcatgcattctcatcctaataatcttttatcatgaatttgatt 2400  
 attacaaaagactggtagctcattaatcataaataaagaaatgtttgttggttgaaacaaa 2460  
 aaacaaagttaagtgttgtgtatgggttctagctagtgggggttttgcattagccattag 2520  
 tacaatcaaaaatcattttactaagatgagaaccagtcattttaaataagacagacgcg 2580  
 gtttcaactaggattaaacattactttaaagaaatgccttcaagatccggtgattcttc 2640  
 catggaatagacaaaattgcatggggatgtttctcatctagtgtggagtgatcattcaga 2700  
 aacaatgtgaagaacttatgagacaatgcagacctaagtggagtgaaaagacttagact 2760  
 cagagctgagtgaaaaaatctcttagtagtattatccatattacatcataaattattaca 2820

← *bdg-3*  
 ttataattgcttgttcaaaaaacaaaaaacaatatgtcttgctacactaggtcaga 2880  
 aacaatttttgaagaatatataaactaatttttgagaggttaaagacataactaata 2940  
 ttaaatattgaatgtgcagACAACAGGCACAAGAGAACGTAGTGTTCATTTCATGGGTTC 3000  
 TTATCATCTCCAGTCTTTGGACGGAGACTCTGTTCCCAAACCTTCTCAGACTCAGCCAAA 3060  
 TCGAATTACAGGTTTCTCGCAGTGGACCTGTTGGGTTATGGGAAAAGTCCAAAGCCGAAC 3120  
 GATTTCATTGTATACATTAAGAGCATTAGAGATGATAGAGAGATCGGTGATTTCTCAG 3240  
 TTCGACTCAAGACATTCATTTAGTGGCTCACTCCCTAGGCTGCATTTTGGCTCTTGGC 3300  
 CTCGCGGTTAAACACCCAGGAGCCATCAAGTCACTCACTCTATTGGCTCCTgtgagtc 3360  
 ataactgtttttatgtgagtaacgcttctcgtgtagtaagtgaatttaactgatata 3420  
 gtgaacgaaatggggaatgcagCCATATTATTCGGTGCCAAAAGGTGTGCAAGGGACGCAA 3480  
 TATGTGATGAGAAGACTGGCCCCAAGGAAGTGTGGCTCCGATGGCTTCGGAGCCTCA 3540  
 GTGGCTAGCTGGTACGAGCACATTAGCCGCACAGTCACTAGTGTGCTTGCAGAATCAT 3600  
 CACTGTTGGAATTTCTCACAGGCTACTCACAGAAACAGgtaccattaatattatctac 3660

*bdg-4* ←  
 tggagcttttcttttggtagaaaaattatagactagaacaattaatgtagccaga 3720  
 cacctttaaatctcttctcctcagattgagatgtggggaattaatgtacataat 3780  
 gcgatgttggtagatatacttaaaatccaatttatgtgtatataaataacttaccg 3840  
 gtaatagtagtagtgcaatgaaaaaggtagaataaactggaatgatgtatccatcacgcat 3900  
 gcagGATGCGAACGTACTTGTATAGAAGGGTCTTGTGTACACACATAACCGCTCATGGC 3960  
 ACCACTACACAACATCATTTCCGGATCGGGGAGCAAAGTAGAGGCTTATTGGACCATG 4020  
 TCCGTGACAACGTGGACTGTGAGGTGCGAGTCTTCCACGGCGGTAGGGACGAGCTGATCC 4080  
 CCGTGGAGTGCAGCTACGGCGTCAAGAGGAAAGTGCACGTGCAAGGATCCACGTCGTCC 4140  
 CCGACAAAGACCACATCACCATTGTGTGGGAGGAGAAAGGAGTTCGCTCGTGAGCTTG 4200  
 AGCTCATTTGGCGCAGATCCACTACTCTCAACTTATTCAATAAAATTAaccttctta 4260  
 ttttaagctaaagtatatataatataaccaaccactattatcacaaccatcattttata 4280  
 cccattcacttttgcataatctcgtgactcctatgtagaaaaaaacagaacatgt 4340

**AY084590**  
 ttcttttgggttgcatttccattatgatttgcgaattttgaaagaaaaatagagtaaata 4400

3' RACE  
 gttttgcggccaagaataaagtggtttgcaatgtgcgtccaatttcggatacccttgcgt 4460

Figure S1.
