# Supplementary material
Source: PubMed Central journal article supplement (PMC1356542)
Supplement: plntcell_tpc.105.036079_2.pdf [file plntcell_tpc.105.036079_2.pdf]

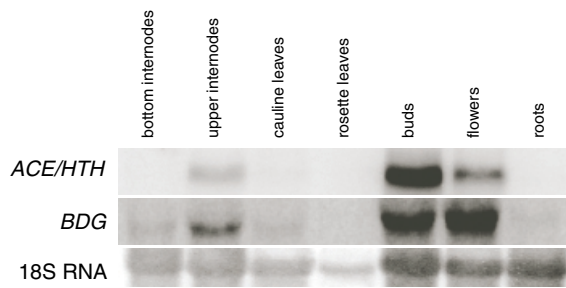

Northern blot hybridization of 10  $\mu$ g of total RNA. The same filter was rehybridized with *BDG*, *ACE/HTH* or 18S RNA probes as a control.

Figure S2.
