# Supplementary material
Source: PubMed Central journal article supplement (PMC1356542)
Supplement: plntcell_tpc.105.036079_3.pdf [file plntcell_tpc.105.036079_3.pdf]

**Table S1.** Composition analysis of residual bound lipids in *bdg* and wild type leaves.

| Compound            | WT Col, $\mu\text{g}/\text{cm}^2$ |                | <i>bdg</i> , $\mu\text{g}/\text{cm}^2$ |                |
|---------------------|-----------------------------------|----------------|----------------------------------------|----------------|
|                     | mean (n=7)                        | $\pm\text{SE}$ | mean (n=5)                             | $\pm\text{SE}$ |
| C16-acid            | 0.1021                            | 0.0036         | 0.2284                                 | 0.0039         |
| C18-(2)-acid        | 0.0300                            | 0.0009         | 0.0801                                 | 0.0036         |
| C18-(1)-acid        | 0.0055                            | 0.0003         | 0.0155                                 | 0.0007         |
| C18-acid            | 0.0083                            | 0.0005         | 0.0187                                 | 0.0009         |
| C16-2-OH-acid       | 0.0121                            | 0.0009         | 0.0314                                 | 0.0025         |
| C16-diacid          | 0.0405                            | 0.0019         | 0.0875                                 | 0.0036         |
| C16-w-OH-acid       | 0.0049                            | 0.0007         | 0.0077                                 | 0.0004         |
| C18-(2)-diacid      | 0.0633                            | 0.0025         | 0.1595                                 | 0.0110         |
| C18-(1)-diacid      | 0.0225                            | 0.0008         | 0.0484                                 | 0.0025         |
| C18-(3)-w-OH-acid   | 0.0028                            | 0.0003         | 0.0086                                 | 0.0037         |
| C18-(2)-w-OH-acid   | 0.0029                            | 0.0003         | 0.0036                                 | 0.0004         |
| C18-diacid          | 0.0119                            | 0.0007         | 0.0281                                 | 0.0016         |
| C18-(1)-w-OH-acid   | 0.0048                            | 0.0005         | 0.0093                                 | 0.0007         |
| C16-10.16-diOH-acid | 0.0063                            | 0.0007         | 0.0130                                 | 0.0011         |
| C22-acid            | 0.0164                            | 0.0009         | 0.0394                                 | 0.0020         |
| C24-(1)-acid        | 0.0057                            | 0.0004         | 0.0135                                 | 0.0010         |
| C24-acid            | 0.0268                            | 0.0011         | 0.0446                                 | 0.0025         |
| C22-7-OH-acid       | 0.0332                            | 0.0018         | 0.0930                                 | 0.0092         |
| C23-(1)-2-OH-acid   | 0.0024                            | 0.0003         | 0.0081                                 | 0.0010         |
| C23-2-OH-acid       | 0.0050                            | 0.0004         | 0.0179                                 | 0.0016         |
| C24-(1)-2-OH-acid   | 0.0523                            | 0.0030         | 0.1241                                 | 0.0094         |
| C24-2-OH-acid       | 0.1195                            | 0.0063         | 0.2761                                 | 0.0183         |
| C26-OH              | 0.0027                            | 0.0003         | 0.0060                                 | 0.0013         |
| C25-(1)-2-OH-acid   | 0.0026                            | 0.0002         | 0.0080                                 | 0.0006         |
| C25-2-OH-acid       | 0.0080                            | 0.0003         | 0.0240                                 | 0.0010         |
| C26-(1)-2-OH-acid   | 0.0072                            | 0.0004         | 0.0167                                 | 0.0013         |
| C26-2-OH-acid       | 0.0396                            | 0.0017         | 0.1053                                 | 0.0073         |
| C28-OH              | 0.0034                            | 0.0003         | 0.0077                                 | 0.0015         |
