# Supplementary material
Source: PubMed Central journal article supplement (PMC1356542)
Supplement: plntcell_tpc.105.036079_4.pdf [file plntcell_tpc.105.036079_4.pdf]

**Table S2.** Composition analysis of epicuticular wax in *bdg* and wild type leaves.

| Compound class | Chain length | WT Col, $\mu\text{g}/\text{cm}^2$ |                |            | <i>bdg</i> , $\mu\text{g}/\text{cm}^2$ |                |            | <i>bdg</i> /WT |
|----------------|--------------|-----------------------------------|----------------|------------|----------------------------------------|----------------|------------|----------------|
|                |              | mean (n=5)                        | $\pm\text{SE}$ | % of total | mean (n=5)                             | $\pm\text{SE}$ | % of total |                |
| Acids          | 24           | 0.038                             | 0.002          | 14.1       | 0.013                                  | 0.003          | 5.5        | 0.3            |
|                | 26           | 0.090                             | 0.005          |            | 0.097                                  | 0.021          |            | 1.1            |
|                | 28           | 0.009                             | 0.001          |            | 0.055                                  | 0.012          |            | 6.3            |
|                | 30           | 0.004                             | 0.001          |            | 0.014                                  | 0.002          |            | 3.5            |
|                | 32           | 0.006                             | 0.003          |            | 0.008                                  | 0.002          |            | 1.4            |
| Alcohols       | 22           | 0.001                             | 0.000          | 35.0       | 0.020                                  | 0.005          | 13.1       | 15.6           |
|                | 26           | 0.011                             | 0.001          |            | 0.024                                  | 0.003          |            | 2.1            |
|                | 28           | 0.030                             | 0.003          |            | 0.082                                  | 0.011          |            | 2.7            |
|                | 30           | 0.119                             | 0.003          |            | 0.148                                  | 0.008          |            | 1.3            |
|                | 32           | 0.183                             | 0.005          |            | 0.153                                  | 0.005          |            | 0.8            |
|                | 34           | 0.018                             | 0.001          |            | 0.019                                  | 0.001          |            | 1.1            |
| Alkanes        | 27           | 0.009                             | 0.001          | 46.3       | 0.088                                  | 0.014          | 76.1       | 10.0           |
|                | 29           | 0.119                             | 0.013          |            | 1.119                                  | 0.181          |            | 9.4            |
|                | 30           | 0.013                             | 0.003          |            | 0.045                                  | 0.006          |            | 3.5            |
|                | 31           | 0.246                             | 0.033          |            | 1.130                                  | 0.081          |            | 4.6            |
|                | 33           | 0.092                             | 0.011          |            | 0.215                                  | 0.014          |            | 2.3            |
| Aldehydes      | 26           | 0.014                             | 0.002          | 4.6        | 0.040                                  | 0.006          | 5.4        | 2.9            |
|                | 28           | 0.002                             | 0.000          |            | 0.046                                  | 0.012          |            | 18.6           |
|                | 30           | 0.013                             | 0.003          |            | 0.030                                  | 0.003          |            | 2.3            |
|                | 32           | 0.014                             | 0.001          |            | 0.043                                  | 0.002          |            | 3.0            |
|                | 34           | 0.004                             | 0.001          |            | 0.024                                  | 0.001          |            | 6.4            |
